# Supplementary material for: Key factors affecting single scattering albedo calculation: Implications for aerosol climate forcing
Source: Copernicus journal article supplement (doi:10.5194/acp-2017-1104), 2017-12-04
Supplement: Supplementary file 1 [file acp-2017-1104-supplement.pdf]

# Supporting Information:

## **Key factors affecting single scattering albedo calculation: Implications for aerosol climate forcing**

Duseong S. Jo<sup>1, a, b</sup>, Rokjin J. Park<sup>1, \*</sup>, Jaein I. Jeong<sup>1</sup>, Gabriele Curci<sup>2</sup>, Hyung-Min Lee<sup>3, c</sup>,  
and Sang-Woo Kim<sup>1</sup>

<sup>1</sup>School of Earth and Environmental Science, Seoul National University, Seoul, Republic of Korea

<sup>2</sup>Department of Physical and Chemical Sciences, Center of Excellence for the Forecast of Severe Weather (CETEMPS), University of L'Aquila, L'Aquila, Italy

<sup>3</sup>Department of Civil, Environmental, and Architectural Engineering, University of Colorado, Boulder, CO, USA

<sup>a</sup>now at Cooperative Institute for Research in Environmental Sciences, University of Colorado, Boulder, CO, USA

<sup>b</sup>now at Department of Chemistry and Biochemistry, University of Colorado, Boulder, CO, USA

<sup>c</sup>now at School of Earth and Environmental Science, Seoul National University, Seoul, Republic of Korea

\*Correspondence to: R. J. Park (rjpark@snu.ac.kr)

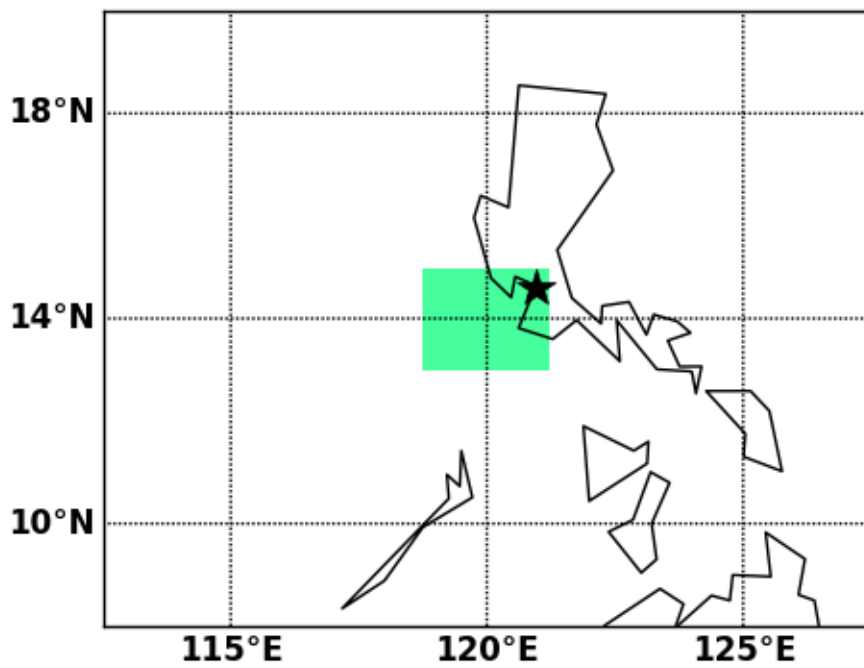

Figure S1. Observation site of SPARTAN network at Manila, Philippines. Black star indicates observation point and green box represents model grid box for the observation site.

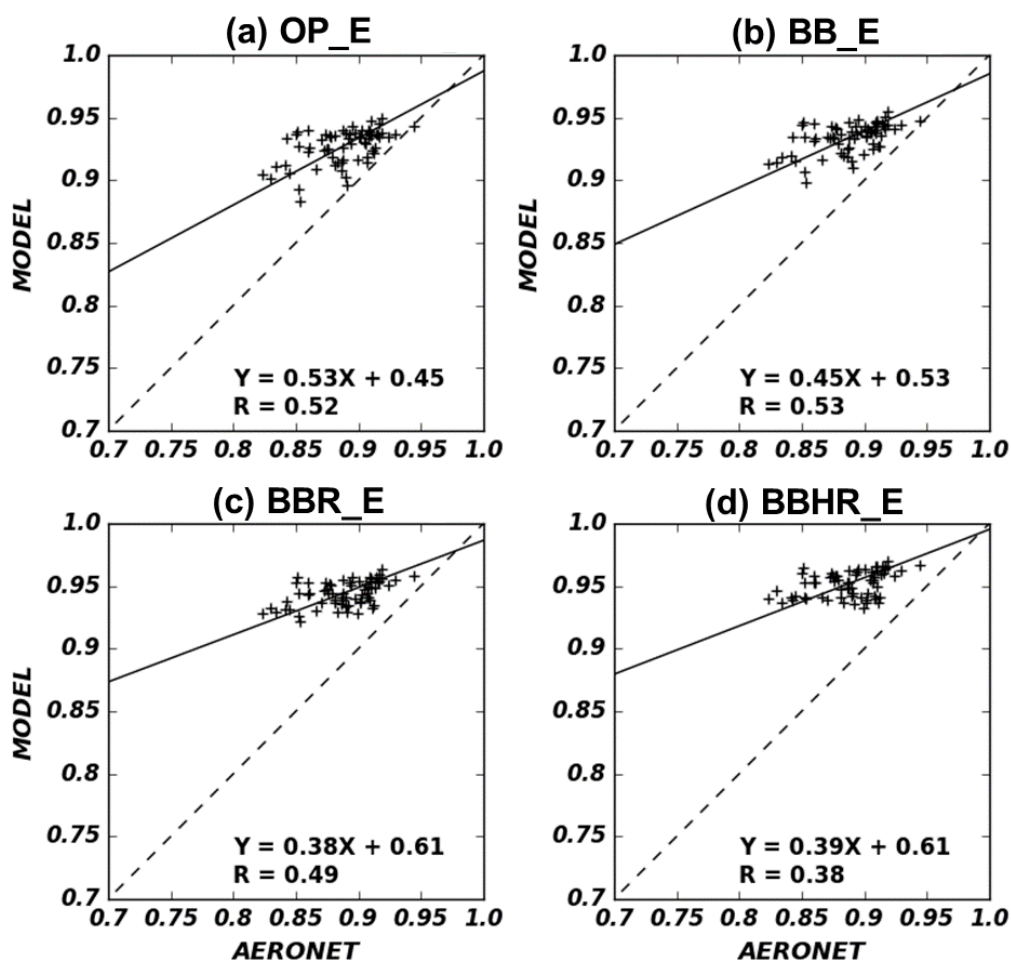

Figure S2. Scatter plots of simulated versus observed SSA at 440 nm for sensitivity simulations of (a) OP\_E, (b) BB\_E, (c) BBR\_E, and (d) BBHR\_E. Calculated mean values of all cases range from 0.927 to 0.952, which are by 4.4-7.2% higher than the observed mean SSA of 0.888. The lowest value is from OP\_E, which is mainly caused by the lowest BC particle density of  $1.0 \text{ g cm}^{-3}$ . Because the particle density is inversely proportional to the number concentration for a given mass concentration, it causes the increase of BC absorption.

Table S1. Statistical parameters for the comparison between the simulated and the observed AOD at 500 nm. Observed mean AOD is 0.250.

| Cases        | Slope | Yict | R    | RMSE  | Mean  | Mean bias |
|--------------|-------|------|------|-------|-------|-----------|
| GEOS_E       | 0.769 | 0.03 | 0.82 | 0.137 | 0.224 | -0.026    |
| OPAC_E       | 0.791 | 0.03 | 0.82 | 0.135 | 0.230 | -0.021    |
| BB_E         | 0.780 | 0.03 | 0.82 | 0.136 | 0.227 | -0.023    |
| BBR_E        | 0.784 | 0.03 | 0.82 | 0.136 | 0.228 | -0.022    |
| BBHR_E       | 0.775 | 0.03 | 0.82 | 0.137 | 0.226 | -0.025    |
| GEOS_H       | 0.489 | 0.00 | 0.73 | 0.214 | 0.120 | -0.130    |
| GEOS_C       | 0.488 | 0.00 | 0.73 | 0.214 | 0.120 | -0.130    |
| OPAC_H       | 0.490 | 0.00 | 0.73 | 0.213 | 0.121 | -0.129    |
| OPAC_C       | 0.489 | 0.00 | 0.73 | 0.213 | 0.121 | -0.130    |
| GEOS_BR_E    | 0.777 | 0.03 | 0.83 | 0.135 | 0.226 | -0.024    |
| GEOS_DK_E    | 0.631 | 0.05 | 0.78 | 0.158 | 0.204 | -0.046    |
| GEOS_DI_E    | 0.652 | 0.04 | 0.79 | 0.153 | 0.208 | -0.043    |
| GEOS_BR_DK_E | 0.641 | 0.05 | 0.78 | 0.156 | 0.206 | -0.045    |
| BB_BR_DK_E   | 0.652 | 0.05 | 0.78 | 0.154 | 0.208 | -0.042    |
| BBR_BR_DK_E  | 0.656 | 0.05 | 0.79 | 0.153 | 0.210 | -0.041    |
| BBHR_BR_DK_E | 0.647 | 0.05 | 0.78 | 0.155 | 0.207 | -0.043    |
| GEOS_BR_DI_E | 0.661 | 0.04 | 0.80 | 0.150 | 0.209 | -0.041    |
| BB_BR_DI_E   | 0.672 | 0.04 | 0.80 | 0.149 | 0.212 | -0.038    |
| BBR_BR_DI_E  | 0.676 | 0.04 | 0.80 | 0.148 | 0.213 | -0.037    |
| BBHR_BR_DI_E | 0.667 | 0.04 | 0.80 | 0.149 | 0.211 | -0.040    |
